# Supplementary material
Source: MDPI journal article supplement (https://www.mdpi.com/2073-4352/11/7/750)

# checkCIF/PLATON report

You have not supplied any structure factors. As a result the full set of tests cannot be run.

THIS REPORT IS FOR GUIDANCE ONLY. IF USED AS PART OF A REVIEW PROCEDURE FOR PUBLICATION, IT SHOULD NOT REPLACE THE EXPERTISE OF AN EXPERIENCED CRYSTALLOGRAPHIC REFEREE.

No syntax errors found.      CIF dictionary      Interpreting this report

## Datablock: 1

---

|                 |                  |                    |               |
|-----------------|------------------|--------------------|---------------|
| Bond precision: | Dy- O = 0.0001 A | Wavelength=1.15450 |               |
| Cell:           | a=5.30945(10)    | b=5.30945(10)      | c=5.30945(10) |
|                 | alpha=90         | beta=90            | gamma=90      |
| Temperature:    | 295 K            |                    |               |
|                 | Calculated       | Reported           |               |
| Volume          | 149.675(8)       | 149.674(8)         |               |
| Space group     | F -4 3 m         | F -4 3 m           |               |
| Hall group      | F -4 2 3         | F -4 2 3           |               |
| Moiety formula  | Dy2 O2, 2(H)     | ?                  |               |
| Sum formula     | Dy2 H2 O2        | H O Dy             |               |
| Mr              | 359.02           | 179.51             |               |
| Dx,g cm-3       | 7.966            | 7.966              |               |
| Z               | 2                | 4                  |               |
| Mu (mm-1)       | 0.000            | 0.000              |               |
| F000            | 75.9             | 0.0                |               |
| F000'           | 299.87           |                    |               |
| h,k,lmax        | 9,9,9            |                    |               |
| Nref            | 62[ 37]          |                    |               |
| Tmin,Tmax       |                  |                    |               |
| Tmin'           |                  |                    |               |

Correction method= Not given

Data completeness= 0.00/0.00      Theta(max)=

R(reflections)=      wR2(reflections)=

S =      Npar=

---

The following ALERTS were generated. Each ALERT has the format  
**test-name\_ALERT\_alert-type\_alert-level.**  
Click on the hyperlinks for more details of the test.

---

## Alert level A

PLAT305\_ALERT\_2\_A Isolated Hydrogen Atom (Outside Bond Range ??) H2 Check

Ionic hydride, therefore isolated hydride ion

## Alert level B

|                                                                    |    |             |
|--------------------------------------------------------------------|----|-------------|
| PLAT111_ALERT_2_B ADDSYM Detects New (Pseudo) Centre of Symmetry . |    | 100 %Fit    |
| PLAT112_ALERT_2_B ADDSYM Detects New (Pseudo) Symm. Elem           | 41 | 100 %Fit    |
| PLAT112_ALERT_2_B ADDSYM Detects New (Pseudo) Symm. Elem           | 41 | 100 %Fit    |
| PLAT112_ALERT_2_B ADDSYM Detects New (Pseudo) Symm. Elem           | 43 | 100 %Fit    |
| PLAT113_ALERT_2_B ADDSYM Suggests Possible Pseudo/New Space Group  |    | Fd-3m Check |

We checked, but Fd-3m is not possible because Z=4 in the current model cannot be realized in Fd-3m (smallest multiplicity is 8) and there are no hints for loss of translational symmetry.

## Alert level C

CRYSC01\_ALERT\_1\_C No recognised colour has been given for crystal colour.  
PLAT041\_ALERT\_1\_C Calc. and Reported SumFormula Strings Differ Please Check

## Alert level G

|                                                                    |      |            |
|--------------------------------------------------------------------|------|------------|
| PLAT004_ALERT_5_G Polymeric Structure Found with Maximum Dimension |      | 3 Info     |
| PLAT045_ALERT_1_G Calculated and Reported Z Differ by a Factor ... |      | 0.50 Check |
| PLAT778_ALERT_2_G Check O..H..X Bond in CIF: H2                    | --O3 | 2.65 Ang.  |
| PLAT778_ALERT_2_G Check O..H..X Bond in CIF: H2                    | --O3 | 2.65 Ang.  |
| PLAT778_ALERT_2_G Check O..H..X Bond in CIF: H2                    | --O3 | 2.65 Ang.  |
| PLAT778_ALERT_2_G Check O..H..X Bond in CIF: H2                    | --O3 | 2.65 Ang.  |
| PLAT778_ALERT_2_G Check O..H..X Bond in CIF: H2                    | --O3 | 2.65 Ang.  |
| PLAT778_ALERT_2_G Check O..H..X Bond in CIF: H2                    | --O3 | 2.65 Ang.  |
| PLAT778_ALERT_2_G Check O..H..X Bond in CIF: O3                    | --H2 | 2.65 Ang.  |
| PLAT778_ALERT_2_G Check O..H..X Bond in CIF: O3                    | --H2 | 2.65 Ang.  |
| PLAT778_ALERT_2_G Check O..H..X Bond in CIF: O3                    | --H2 | 2.65 Ang.  |
| PLAT778_ALERT_2_G Check O..H..X Bond in CIF: O3                    | --H2 | 2.65 Ang.  |
| PLAT778_ALERT_2_G Check O..H..X Bond in CIF: O3                    | --H2 | 2.65 Ang.  |
| PLAT778_ALERT_2_G Check O..H..X Bond in CIF: O3                    | --H2 | 2.65 Ang.  |
| PLAT778_ALERT_2_G Check O..H..X Bond in CIF: O3                    | --H2 | 2.65 Ang.  |

- 1 **ALERT level A** = Most likely a serious problem - resolve or explain  
5 **ALERT level B** = A potentially serious problem, consider carefully  
2 **ALERT level C** = Check. Ensure it is not caused by an omission or oversight  
14 **ALERT level G** = General information/check it is not something unexpected

- 3 ALERT type 1 CIF construction/syntax error, inconsistent or missing data  
18 ALERT type 2 Indicator that the structure model may be wrong or deficient  
0 ALERT type 3 Indicator that the structure quality may be low  
0 ALERT type 4 Improvement, methodology, query or suggestion  
1 ALERT type 5 Informative message, check

It is advisable to attempt to resolve as many as possible of the alerts in all categories. Often the minor alerts point to easily fixed oversights, errors and omissions in your CIF or refinement strategy, so attention to these fine details can be worthwhile. In order to resolve some of the more serious problems it may be necessary to carry out additional measurements or structure refinements. However, the purpose of your study may justify the reported deviations and the more serious of these should normally be commented upon in the discussion or experimental section of a paper or in the "special\_details" fields of the CIF. checkCIF was carefully designed to identify outliers and unusual parameters, but every test has its limitations and alerts that are not important in a particular case may appear. Conversely, the absence of alerts does not guarantee there are no aspects of the results needing attention. It is up to the individual to critically assess their own results and, if necessary, seek expert advice.

### **Publication of your CIF in IUCr journals**

A basic structural check has been run on your CIF. These basic checks will be run on all CIFs submitted for publication in IUCr journals (*Acta Crystallographica*, *Journal of Applied Crystallography*, *Journal of Synchrotron Radiation*); however, if you intend to submit to *Acta Crystallographica Section C* or *E* or *IUCrData*, you should make sure that full publication checks are run on the final version of your CIF prior to submission.

### **Publication of your CIF in other journals**

Please refer to the *Notes for Authors* of the relevant journal for any special instructions relating to CIF submission.

---

**PLATON version of 16/05/2021; check.def file version of 13/05/2021**

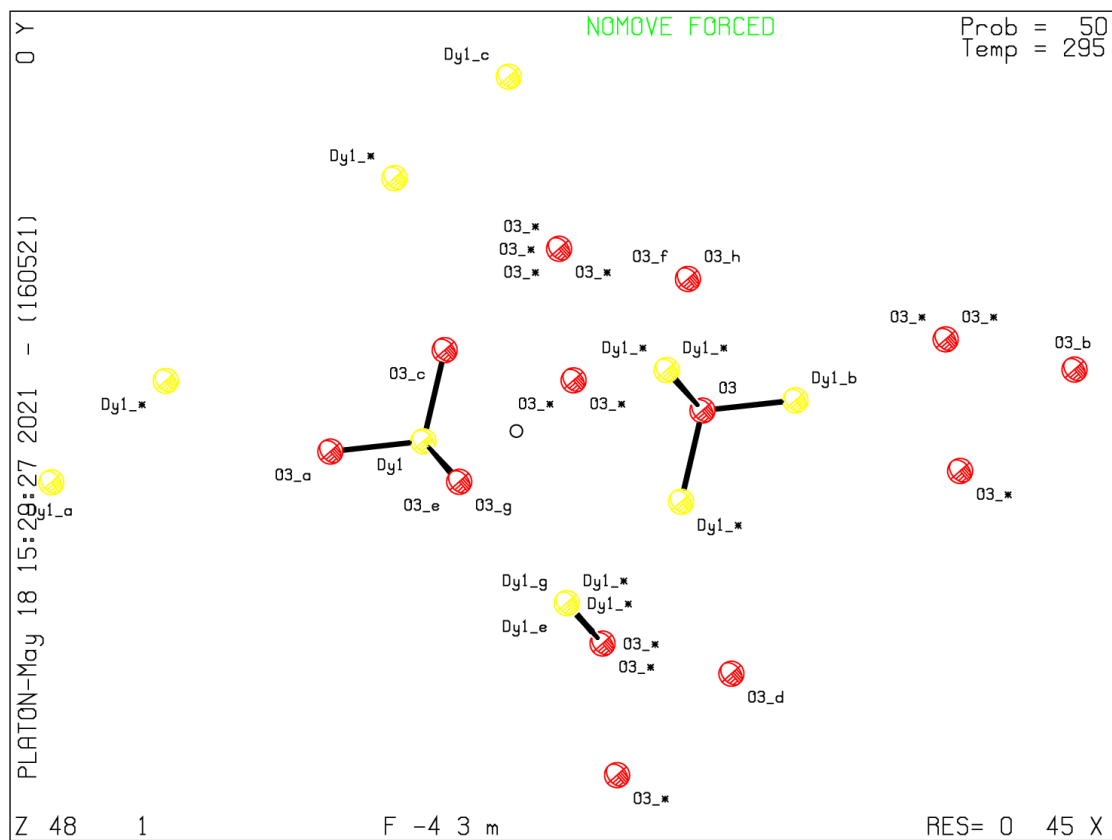

Supplement: s1 [file s1]
